# Supplementary material for: Robust spin-on-glass poly(methyl)silsesquioxane-based low-k materials derived from a cyclic siloxane precursor
Source: Royal Society of Chemistry journal article supplement (doi:10.1039/c5ra11110b), 2015-01-01
Supplement: c5ra11110b1.pdf [file c5ra11110b1.pdf]

## Supporting Information for:

### Robust Spin-on-Glass Poly(methyl)silsesquioxane-based Low- $k$ Materials Derived from a Cyclic Siloxane Precursor

Albert S. Lee,<sup>a</sup> Sung Yeoun Oh,<sup>a</sup> Seung-Sock Choi,<sup>a</sup> He Seung Lee,<sup>a</sup> Seung Sang Hwang<sup>ab</sup> and Kyung-Youl Baek<sup>ab\*</sup>

<sup>a</sup>Materials Architecturing Research Center, Korea Institute of Science and Technology, Hwarangno 14-gil 5, Seong-Buk Gu, Seoul 136-791

<sup>b</sup>Nanomaterials Science and Engineering, University of Science and Technology, 217 Gajungro, 176 Gajung-dong, Yuseong-Gu, Daejeon 305-333, Republic of Korea

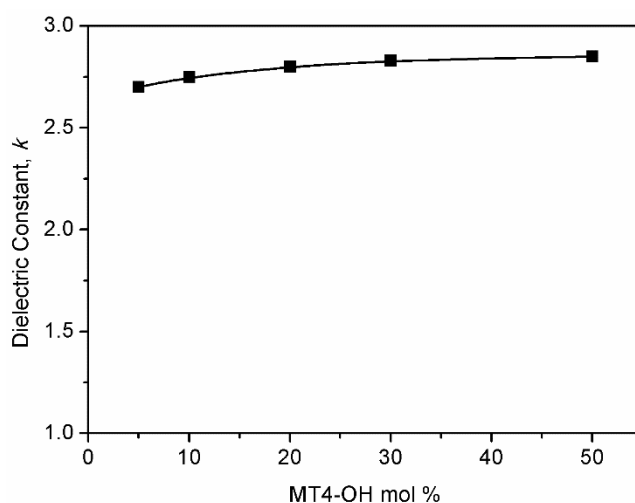

Fig S1. Dielectric constant values for MT4-MSSQ spin-on-glass as-cast resins

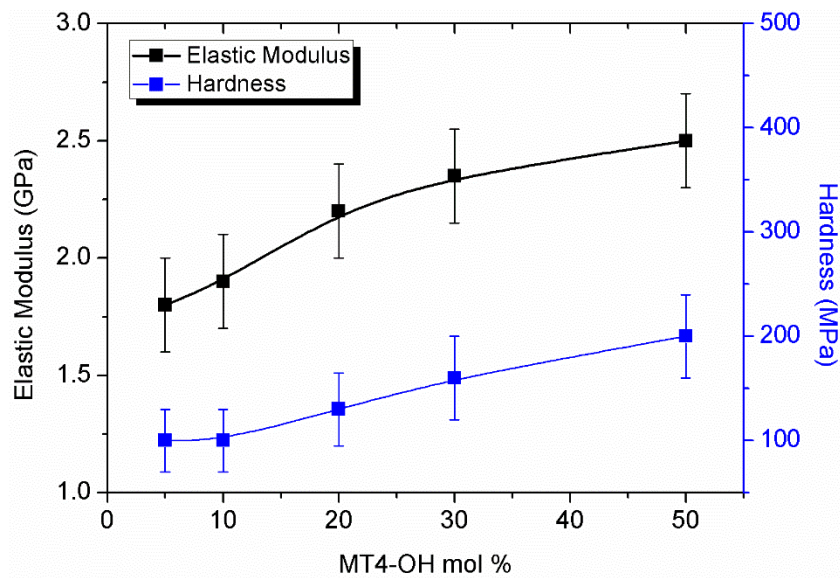

Fig S2. Elastic Moduli and hardness values of various MT4-MSSQ spin-on-glass as-cast resins
